# Supplementary material
Source: Springer Nature journal article supplement (https://www.springermedizin.de/resource/supplementary/12958_2010_784_MOESM1_ESM.pdf/9568918)

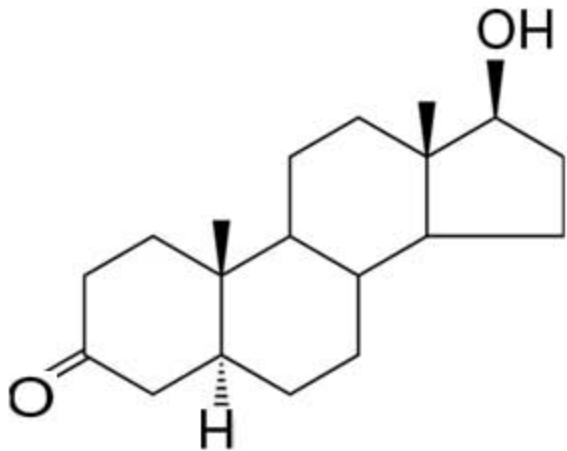

**5 $\alpha$ -Dihydrotestosterone  
(5 $\alpha$ -DHT)**

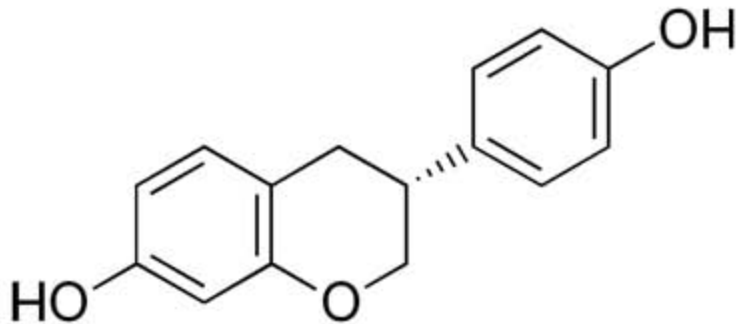

**Equol**

Supplement: MOESM1 [file 9568918]
